# Supplementary material for: Extracellular vesicle microRNA quantification from plasma using an integrated microfluidic device
Source: PubMed Central journal article supplement (PMC6527557; doi:10.1038/s42003-019-0435-1), 2019-05-20
Supplement: 42003_2019_435_MOESM2_ESM.pdf [file 42003_2019_435_MOESM2_ESM.pdf]

## **Description of Additional Supplementary Files**

**File Name:** Supplementary Data 1

**Description:** Excel file with data for all figures in main text.
